# Supplementary material for: Fast, low-cost and highly specific colorimetric RT-LAMP assays for inference of SARS-CoV-2 Omicron BA.1 and BA.2 lineages
Source: Royal Society of Chemistry journal article supplement (doi:10.1039/d2an01625g), 2022-01-01
Supplement: d2an01625g1.pdf [file d2an01625g1.pdf]

## Supporting Information

### **Fast, low-cost and highly specific colorimetric RT-LAMP assays for inference of SARS-CoV-2 Omicron BA.1 and BA.2 lineages**

Paulo Felipe Neves Estrela<sup>1</sup>, Carlos Abelardo dos Santos<sup>2</sup>, Paola Cristina Resende<sup>3</sup>, Patricia Mayer Lima<sup>3</sup>, Thauane dos Santos Correia da Silva<sup>3</sup>, Leonardo Saboia Vahia Matilde<sup>3</sup>, Marilda Mendonça Siqueira<sup>3</sup>, Elisângela de Paula Silveira-Lacerda<sup>2</sup>, Gabriela Rodrigues Mendes Duarte<sup>1\*</sup>

1- Laboratório de Biomicrofluídica - Instituto de Química - Universidade Federal de Goiás, 74690-900, Goiânia-GO, Brazil.

2- Laboratório de Genética Molecular e Citogenética - Instituto de Ciências Biológicas - Universidade Federal de Goiás, 74001-970, Goiânia-GO, Brazil.

3- Laboratory of Respiratory Viruses and Measles, Oswaldo Cruz Institute, FIOCRUZ, Reference Laboratory for COVID-19 (WHO), 21040-360, Manguinhos, Rio de Janeiro-RJ, Brazil.

\*To whom correspondence should be addressed:

Prof. Gabriela R M Duarte  
Instituto de Química  
Universidade Federal de Goiás  
Campus Samambaia, 74690-900  
Goiânia-Go  
Brasil  
E-mail: gabriela\_duarte@ufg.br

**Table S1.** RNA samples with the GISAID number to access the deposited genome, its respective lineages, the cycle threshold (Ct) and the results of the BA.1 and BA.2 inference RT-LAMP assays.

| Number | GISAID          | Lineage   | Ct    | RT-LAMP results |      |
|--------|-----------------|-----------|-------|-----------------|------|
|        |                 |           |       | BA.1            | BA.2 |
| 01     |                 | NTC       | NCq   | -               | -    |
| 02     | EPI_ISL_6173026 | P.1       | 12,89 | -               | -    |
| 03     | EPI_ISL_6970841 | AY.101    | 15,95 | -               | -    |
| 04     | EPI_ISL_6173058 | AY.99.2   | 19,61 | -               | -    |
| 05     | EPI_ISL_6173059 | AY.99.2   | 25,06 | -               | -    |
| 06     | EPI_ISL_6943955 | AY.99.2   | 20,71 | -               | -    |
| 07     | EPI_ISL_5689787 | AY.99.2   | 23,15 | -               | -    |
| 08     | EPI_ISL_5689790 | P.1.7     | 17,51 | -               | -    |
| 09     | EPI_ISL_6173471 | P.1       | 13,89 | -               | -    |
| 10     | EPI_ISL_7105314 | AY.46.3   | 19,06 | -               | -    |
| 11     | EPI_ISL_6173506 | AY.43.2   | 17,73 | -               | -    |
| 12     | EPI_ISL_6173394 | AY.101    | 17,59 | -               | -    |
| 13     | EPI_ISL_7104590 | AY.101    | 24,02 | -               | -    |
| 14     | EPI_ISL_6173424 | AY.116    | 17,35 | -               | -    |
| 15     | EPI_ISL_6173427 | AY.46.3   | 20,61 | -               | -    |
| 16     | EPI_ISL_6173436 | AY.116    | 19,52 | -               | -    |
| 17     | EPI_ISL_6173439 | AY.100    | 18,93 | -               | -    |
| 18     | EPI_ISL_6173192 | AY.34.1.1 | 14,91 | -               | -    |
| 19     | EPI_ISL_7103181 | AY.46.3   | 25,32 | -               | -    |
| 20     | EPI_ISL_6173213 | AY.99.11  | 16,85 | -               | -    |
| 21     | EPI_ISL_6173215 | AY.99.1   | 20,66 | -               | -    |
| 22     | EPI_ISL_6173217 | AY.122    | 21,07 | -               | -    |
| 23     | EPI_ISL_6173218 | AY.99.1   | 21,97 | -               | +    |
| 24     | EPI_ISL_6173219 | AY.99.1   | 19,37 | -               | -    |
| 25     | EPI_ISL_7103321 | AY.36     | 25,65 | -               | -    |
| 26     | EPI_ISL_6173260 | AY.99.1   | 12,99 | -               | -    |
| 27     | EPI_ISL_6173279 | AY.34.1.1 | 18,80 | -               | -    |
| 28     | EPI_ISL_6173288 | AY.100    | 18,01 | -               | -    |
| 29     | EPI_ISL_6173346 | P.1.7     | 19,44 | -               | -    |
| 30     | EPI_ISL_6173370 | P.1.7     | 17,20 | -               | -    |
| 31     | EPI_ISL_6173371 | P.1.7     | 17,28 | -               | -    |
| 32     | EPI_ISL_6173385 | P.1       | 16,30 | -               | -    |
| 33     | EPI_ISL_7104697 | AY.46.3   | 18,71 | -               | -    |
| 34     | EPI_ISL_6172761 | AY.122    | 23,03 | -               | -    |
| 35     | EPI_ISL_6898999 | P.1.7     | 21,98 | -               | -    |
| 36     | EPI_ISL_6899000 | P.1.7     | 26,25 | -               | -    |
| 37     | EPI_ISL_6899001 | P.1.7     | 20,48 | -               | -    |
| 38     | EPI_ISL_7110676 | AY.43.2   | 16,11 | -               | -    |
| 39     | EPI_ISL_7110161 | AY.34.1.1 | 15,18 | -               | -    |
| 40     | EPI_ISL_6898401 | AY.43.8   | 16,13 | -               | -    |
| 41     | EPI_ISL_6898406 | AY.43     | 15,63 | -               | -    |
| 42     | EPI_ISL_6898411 | AY.43     | 16,87 | -               | -    |
| 43     | EPI_ISL_6898415 | AY.43.8   | 18,07 | -               | -    |
| 44     | EPI_ISL_6898419 | AY.43     | 21,26 | -               | -    |

|    |                 |           |       |   |   |
|----|-----------------|-----------|-------|---|---|
| 45 | EPI_ISL_6898426 | AY.43.8   | 17,29 | - | - |
| 46 | EPI_ISL_6898435 | AY.43     | 21,69 | - | - |
| 47 | EPI_ISL_6898365 | AY.43     | 15,91 | - | - |
| 48 | EPI_ISL_6898370 | AY.43.8   | 19,99 | - | - |
| 49 | EPI_ISL_6898436 | AY.43     | 17,30 | - | - |
| 50 | EPI_ISL_6898445 | AY.43     | 20,48 | - | - |
| 51 | EPI_ISL_6898452 | AY.43     | 23,92 | - | - |
| 52 | EPI_ISL_6898453 | AY.43     | 17,72 | - | - |
| 53 | EPI_ISL_6898461 | AY.43     | 20,45 | - | - |
| 54 | EPI_ISL_6898465 | AY.43.8   | 19,83 | - | - |
| 55 | EPI_ISL_6898474 | AY.43     | 20,65 | - | - |
| 56 | EPI_ISL_6898516 | AY.43     | 20,33 | - | - |
| 57 | EPI_ISL_6898382 | AY.43     | 20,28 | - | - |
| 58 | EPI_ISL_6898490 | AY.43     | 16,46 | - | - |
| 59 | EPI_ISL_6898387 | AY.43     | 20,74 | - | - |
| 60 | EPI_ISL_6898497 | AY.43     | 15,83 | - | - |
| 61 | EPI_ISL_6898509 | AY.43     | 19,29 | - | - |
| 62 | EPI_ISL_6898988 | P.1       | 16,41 | - | - |
| 63 | EPI_ISL_6772671 | AY.122    | 21,17 | - | - |
| 64 | EPI_ISL_6771823 | AY.43.2   | 17,38 | - | - |
| 65 | EPI_ISL_6771824 | AY.43.2   | 18,11 | - | - |
| 66 | EPI_ISL_6772595 | AY.34.1   | 17,90 | - | - |
| 67 | EPI_ISL_6772487 | AY.34.1   | 20,10 | - | - |
| 68 | EPI_ISL_6771458 | B.1.617.2 | 16,06 | - | - |
| 69 | EPI_ISL_6771523 | B.1.617.2 | 17,71 | - | - |
| 70 | EPI_ISL_6771536 | B.1.617.2 | 20,78 | - | - |
| 71 | EPI_ISL_6771566 | B.1.617.2 | 20,03 | - | - |
| 72 | EPI_ISL_6771550 | B.1.617.2 | 18,18 | - | - |
| 73 | EPI_ISL_7113067 | AY.34.1.1 | 21,31 | - | - |
| 74 | EPI_ISL_7112146 | AY.42     | 21,64 | - | - |
| 75 | EPI_ISL_7112759 | AY.42     | 21,08 | - | - |
| 76 | EPI_ISL_7111529 | AY.124.1  | 18,90 | - | - |
| 77 |                 | NTC       | NCq   | - | - |
| 78 | EPI_ISL_7456033 | P.1.7     | 21,26 | - | - |
| 79 | EPI_ISL_7112752 | P.1.7     | 19,27 | - | - |
| 80 | EPI_ISL_7112165 | AY.42     | 20,80 | - | - |
| 81 | EPI_ISL_7111567 | AY.26     | 20,25 | - | - |
| 82 | EPI_ISL_7111580 | AY.124.1  | 22,39 | - | - |
| 83 | EPI_ISL_7112239 | AY.42     | 28,15 | - | - |
| 84 | EPI_ISL_7111653 | AY.42     | 18,92 | - | - |
| 85 | EPI_ISL_7111720 | AY.124.1  | 15,72 | - | - |
| 86 | EPI_ISL_7111737 | AY.124.1  | 20,38 | - | - |
| 87 | EPI_ISL_7112080 | P.1.7     | 19,84 | - | - |
| 88 | EPI_ISL_7112776 | AY.43     | 28,99 | - | - |
| 89 | EPI_ISL_6980334 | AY.47     | 22,25 | - | - |
| 90 | EPI_ISL_6980430 | AY.100    | 18,95 | - | - |
| 91 | EPI_ISL_6980613 | P.1       | 21,61 | - | - |
| 92 | EPI_ISL_7455352 | P.1.7     | 20,94 | - | - |

|     |                 |           |       |   |   |
|-----|-----------------|-----------|-------|---|---|
| 93  | EPI_ISL_7455353 | P.1.7     | 24,13 | - | - |
| 94  | EPI_ISL_7455354 | P.1.7     | 16,46 | - | - |
| 95  | EPI_ISL_7455358 | P.1.7     | 24,29 | - | - |
| 96  | EPI_ISL_7455359 | P.1.7     | 28,02 | - | - |
| 97  | EPI_ISL_7455362 | P.1.4     | 27,37 | - | - |
| 98  | EPI_ISL_7455363 | P.1.7     | 25,50 | - | - |
| 99  | EPI_ISL_7455365 | P.1.7     | 21,77 | - | - |
| 100 | EPI_ISL_7455366 | P.1.7     | 21,96 | - | - |
| 101 | EPI_ISL_7455368 | AY.43     | 26,21 | - | - |
| 102 | EPI_ISL_7455646 | AY.6      | 26,68 | - | - |
| 103 | EPI_ISL_7455655 | AY.6      | 17,77 | - | - |
| 104 | EPI_ISL_7455669 | AY.6      | 32,84 | - | - |
| 105 | EPI_ISL_7455670 | AY.6      | 17,00 | - | - |
| 106 | EPI_ISL_7455671 | AY.6      | 24,57 | - | - |
| 107 | EPI_ISL_7455673 | AY.34.1.1 | 24,14 | - | - |
| 108 | EPI_ISL_7455674 | AY.34.1.1 | 21,87 | - | - |
| 109 | EPI_ISL_7455681 | P.1       | 27,71 | - | - |
| 110 | EPI_ISL_7455705 | AY.34.1.1 | 22,55 | - | - |
| 111 | EPI_ISL_7455769 | AY.34.1.1 | 26,38 | - | - |
| 112 | EPI_ISL_7455734 | AY.34.1.1 | 25,60 | - | - |
| 113 | EPI_ISL_8004512 | AY.43.1   | 24,75 | - | - |
| 114 | EPI_ISL_8004423 | AY.4      | 17,74 | - | - |
| 115 | EPI_ISL_8005716 | AY.125    | 16,01 | - | - |
| 116 | EPI_ISL_8005691 | B.1.617.2 | 17,68 | - | - |
| 117 | EPI_ISL_8005696 | AY.34.1   | 14,68 | - | - |
| 118 | EPI_ISL_8005697 | AY.34.1.1 | 20,50 | - | - |
| 119 | EPI_ISL_7379459 | AY.4      | 23,45 | - | - |
| 120 | EPI_ISL_8325073 | AY.124    | 23,17 | - | - |
| 121 | EPI_ISL_8325094 | P.1.7     | 20,90 | - | - |
| 122 | EPI_ISL_8325103 | P.1       | 15,92 | - | - |
| 123 | EPI_ISL_8325112 | P.1.7     | 20,46 | - | - |
| 124 | EPI_ISL_8013071 | AY.124    | 20,27 | - | - |
| 125 | EPI_ISL_8013092 | P.1.7     | 24,20 | - | - |
| 126 | EPI_ISL_8013093 | P.1.7     | 25,10 | - | - |
| 127 | EPI_ISL_8013140 | AY.3      | 18,66 | - | - |
| 128 | EPI_ISL_8013175 | AY.34.1.1 | 22,29 | - | - |
| 129 | EPI_ISL_8013122 | P.1.7     | 17,98 | - | - |
| 130 | EPI_ISL_8013038 | AY.3      | 18,91 | - | - |
| 131 | EPI_ISL_8013053 | AY.3.3    | 23,42 | - | - |
| 132 | EPI_ISL_8013040 | AY.3.3    | 19,93 | - | - |
| 133 | EPI_ISL_8013103 | AY.46.3   | 18,80 | - | - |
| 134 | EPI_ISL_8430628 | AY.43.1   | 16,98 | - | - |
| 135 | EPI_ISL_8152421 | AY.116    | 17,39 | - | - |
| 136 | EPI_ISL_8152423 | AY.121    | 15,09 | - | - |
| 137 | EPI_ISL_8332314 | AY.34.1   | 19,75 | - | - |
| 138 | EPI_ISL_8266314 | P.1.7     | 19,24 | - | - |
| 139 | EPI_ISL_8266351 | AY.43.7   | 21,16 | - | - |
| 140 | EPI_ISL_8266367 | B.1.617.2 | 15,96 | - | - |

|     |                 |           |       |   |   |
|-----|-----------------|-----------|-------|---|---|
| 141 | EPI_ISL_8151572 | AY.68     | 17,78 | - | - |
| 142 | EPI_ISL_8266423 | BA.1      | 24,94 | + | - |
| 143 | EPI_ISL_8266400 | BA.1      | 18,89 | + | - |
| 144 | EPI_ISL_8266417 | BA.1      | 20,11 | + | - |
| 145 | EPI_ISL_8266420 | BA.1      | 21,55 | + | - |
| 146 | EPI_ISL_8266399 | BA.1.1    | 19,21 | + | - |
| 147 | EPI_ISL_8266409 | BA.1      | 19,27 | + | - |
| 148 | EPI_ISL_8266407 | BA.1      | 19,79 | + | - |
| 149 | EPI_ISL_8266395 | BA.1      | 16,44 | + | - |
| 150 | EPI_ISL_8266408 | BA.1      | 20,17 | + | - |
| 151 | EPI_ISL_8266415 | BA.1      | 19,13 | + | - |
| 152 | EPI_ISL_8266422 | BA.1      | 23,66 | + | - |
| 153 | EPI_ISL_8266412 | BA.1      | 21,73 | + | - |
| 154 | EPI_ISL_8266396 | BA.1      | 17,96 | + | - |
| 155 | EPI_ISL_8266397 | BA.1      | 17,00 | + | - |
| 156 | EPI_ISL_8266384 | BA.1      | 17,97 | + | - |
| 157 | EPI_ISL_8266411 | BA.1      | 17,32 | + | - |
| 158 | EPI_ISL_8266402 | BA.1      | 18,25 | + | - |
| 159 | EPI_ISL_8266413 | BA.1      | 19,45 | + | - |
| 160 | EPI_ISL_8266418 | BA.1      | 22,55 | + | - |
| 161 | EPI_ISL_8266410 | BA.1.1    | 21,27 | + | - |
| 162 | EPI_ISL_8266401 | BA.1.1    | 15,92 | + | - |
| 163 | EPI_ISL_8266390 | BA.1      | 17,97 | + | - |
| 164 | EPI_ISL_8266403 | BA.1      | 20,20 | + | - |
| 165 | EPI_ISL_8266398 | BA.1      | 16,21 | + | - |
| 166 | EPI_ISL_8266419 | BA.1      | 31,06 | - | - |
| 167 |                 | NTC       | NCq   | - | - |
| 168 | EPI_ISL_8266391 | BA.1.1    | 19,96 | + | - |
| 169 | EPI_ISL_8266416 | BA.1      | 20,49 | + | - |
| 170 | EPI_ISL_8266393 | BA.1.1    | 15,58 | + | - |
| 171 | EPI_ISL_8266406 | BA.1      | 19,41 | + | - |
| 172 | EPI_ISL_8266421 | BA.1      | 20,98 | + | - |
| 173 | EPI_ISL_8266404 | BA.1      | 20,97 | + | - |
| 174 | EPI_ISL_8266414 | BA.1      | 20,63 | + | - |
| 175 | EPI_ISL_8266392 | BA.1.1    | 19,59 | + | - |
| 176 | EPI_ISL_8266394 | BA.1      | 16,55 | + | - |
| 177 | EPI_ISL_8266405 | BA.1      | 17,41 | + | - |
| 178 | EPI_ISL_8266270 | AY.26     | 23,12 | - | - |
| 179 | EPI_ISL_8266277 | P.1.7     | 21,93 | - | - |
| 180 | EPI_ISL_8266281 | AY.34.1.1 | 25,13 | - | - |
| 181 | EPI_ISL_8325152 | AY.34.1.1 | 20,81 | - | - |
| 182 | EPI_ISL_8325172 | AY.26     | 17,57 | - | - |
| 183 | EPI_ISL_8325065 | AY.102    | 27,29 | - | - |
| 184 | EPI_ISL_8325213 | AY.99     | 25,62 | - | - |
| 185 | EPI_ISL_8331980 | AY.43.7   | 23,69 | - | - |
| 186 | EPI_ISL_8332052 | AY.99     | 15,49 | - | + |
| 187 | EPI_ISL_8325315 | AY.122    | 24,97 | - | - |
| 188 | EPI_ISL_8325241 | AY.34.1.1 | 26,17 | - | - |

|     |                 |           |       |   |   |
|-----|-----------------|-----------|-------|---|---|
| 189 | EPI_ISL_8325329 | AY.36     | 23,11 | - | - |
| 190 | EPI_ISL_8325221 | AY.34.1.1 | 19,49 | - | - |
| 191 | EPI_ISL_8325237 | AY.34     | 16,73 | - | - |
| 192 | EPI_ISL_8325251 | AY.36     | 19,04 | - | - |
| 193 | EPI_ISL_8325228 | AY.99     | 24,39 | - | - |
| 194 | EPI_ISL_8325323 | AY.118    | 17,87 | - | - |
| 195 | EPI_ISL_8325365 | BA.1      | 16,12 | + | - |
| 196 | EPI_ISL_8325366 | BA.1      | 20,94 | + | + |
| 197 | EPI_ISL_8325367 | BA.1      | 29,10 | - | - |
| 198 | EPI_ISL_8325368 | BA.1      | 20,14 | + | - |
| 199 | EPI_ISL_8325369 | BA.1      | 18,71 | + | - |
| 200 | EPI_ISL_8325371 | BA.1      | 17,18 | + | - |
| 201 | EPI_ISL_8325373 | BA.1      | 19,75 | + | - |
| 202 | EPI_ISL_8430487 | BA.1      | 17,96 | + | - |
| 203 | EPI_ISL_8430499 | BA.1.1    | 16,39 | + | - |
| 204 | EPI_ISL_8430551 | AY.102    | 22,28 | - | - |
| 205 | EPI_ISL_8430584 | AY.43.2   | 20,08 | - | - |
| 206 | EPI_ISL_8430600 | P.1.7     | 18,66 | - | - |
| 207 | EPI_ISL_8430606 | AY.34     | 18,45 | - | - |
| 208 | EPI_ISL_8430501 | AY.59     | 18,36 | - | - |
| 209 | EPI_ISL_8430502 | BA.1.1    | 22,93 | + | - |
| 210 | EPI_ISL_8430523 | BA.1.1    | 18,60 | + | - |
| 211 | EPI_ISL_8430537 | BA.1.1    | 23,63 | + | - |
| 212 | EPI_ISL_8633939 | AY.120    | 19,33 | - | - |
| 213 | EPI_ISL_8633976 | AY.4      | 18,57 | - | - |
| 214 | EPI_ISL_8633985 | BA.1.1    | 15,63 | + | - |
| 215 | EPI_ISL_8633918 | BA.1      | 17,91 | + | - |
| 216 | EPI_ISL_8633919 | BA.1      | 17,75 | + | - |
| 217 | EPI_ISL_8633930 | BA.1.1    | 20,43 | + | - |
| 218 | EPI_ISL_8797131 | BA.1.1    | 17,16 | + | - |
| 219 | EPI_ISL_8797057 | BA.1.1    | 20,32 | + | - |
| 220 | EPI_ISL_8797061 | BA.1.1    | 20,14 | + | - |
| 221 | EPI_ISL_9225946 | BA.1      | 23,75 | + | - |
| 222 | EPI_ISL_9708696 | BA.1.1    | 19,63 | + | - |
| 223 | EPI_ISL_9225657 | BA.1.1    | 23,12 | + | - |
| 224 | EPI_ISL_9225672 | BA.1.1    | 17,29 | + | - |
| 225 | EPI_ISL_9225664 | BA.1.1    | 21,72 | + | - |
| 226 | EPI_ISL_9225704 | BA.1      | 17,53 | + | - |
| 227 | EPI_ISL_9225702 | BA.1.1    | 17,76 | + | - |
| 228 | EPI_ISL_9225701 | BA.1      | 18,57 | + | - |
| 229 | EPI_ISL_9225703 | BA.1      | 19,86 | + | - |
| 230 | EPI_ISL_9571832 | BA.1.1    | 23,42 | + | - |
| 231 | EPI_ISL_9571833 | BA.1.1    | 23,42 | + | - |
| 232 | EPI_ISL_9571814 | BA.1.1    | 20,50 | + | - |
| 233 | EPI_ISL_9671629 | B.1.617.2 | 22,72 | - | - |
| 234 | EPI_ISL_9671587 | AY.3      | 21,82 | - | - |
| 235 | EPI_ISL_9919666 | BA.1.1    | 24,82 | + | - |
| 236 | EPI_ISL_9919676 | BA.1.1    | 17,32 | + | - |

|     |                  |           |       |   |   |
|-----|------------------|-----------|-------|---|---|
| 237 | EPI_ISL_9919759  | BA.1.1    | 21,26 | + | - |
| 238 | EPI_ISL_9919677  | BA.1.1    | 25,31 | + | - |
| 239 | EPI_ISL_9919755  | BA.1.1    | 24,60 | + | - |
| 240 | EPI_ISL_10521724 | BA.1.1    | 18,47 | + | - |
| 241 | EPI_ISL_11016298 | AY.34.1.1 | 21,40 | - | - |
| 242 | EPI_ISL_11016499 | AY.23     | 20,65 | - | - |
| 243 | EPI_ISL_11016307 | AY.4      | 21,71 | - | - |
| 244 |                  | NTC       | NCq   | - | - |
| 245 | EPI_ISL_9225599  | BA.1.1    | 21,27 | + | - |
| 246 | EPI_ISL_9225590  | BA.1.1    | 29,61 | - | - |
| 247 | EPI_ISL_9225680  | BA.1.1    | 20,51 | + | - |
| 248 | EPI_ISL_9225689  | BA.1.1    | 21,18 | + | - |
| 249 | EPI_ISL_9225610  | BA.1.1    | 20,41 | + | - |
| 250 | EPI_ISL_9225667  | BA.1.1    | 16,68 | + | - |
| 251 | EPI_ISL_9225628  | BA.1.1    | 17,10 | + | - |
| 252 | EPI_ISL_9225625  | BA.1.1    | 16,84 | + | - |
| 253 | EPI_ISL_9225658  | BA.1.1    | 20,39 | + | - |
| 254 | EPI_ISL_9225605  | BA.1.1    | 20,70 | + | - |
| 255 | EPI_ISL_9225678  | BA.1.1    | 18,90 | + | - |
| 256 | EPI_ISL_9225692  | BA.1.1    | 17,44 | + | - |
| 257 | EPI_ISL_9225617  | BA.1.1    | 15,93 | + | - |
| 258 | EPI_ISL_9571756  | BA.2      | 17,01 | - | + |
| 259 | EPI_ISL_9571745  | BA.2      | 20,76 | - | + |
| 260 | EPI_ISL_9571594  | BA.2      | 24,91 | - | + |
| 261 | EPI_ISL_9919680  | BA.1.1    | 19,89 | + | - |
| 262 | EPI_ISL_10322498 | BA.2      | 17,68 | - | + |
| 263 | EPI_ISL_10521863 | BA.2      | 26,60 | - | - |
| 264 | EPI_ISL_10521714 | BA.2      | 21,96 | - | + |
| 265 | EPI_ISL_10521710 | BA.2      | 17,93 | - | + |
| 266 | EPI_ISL_10521716 | BA.2      | 18,51 | - | + |
| 267 | EPI_ISL_10322284 | BA.2      | 15,44 | - | + |

The symbols - and + refer to negative and positive results, respectively. **NTC**: no template control.

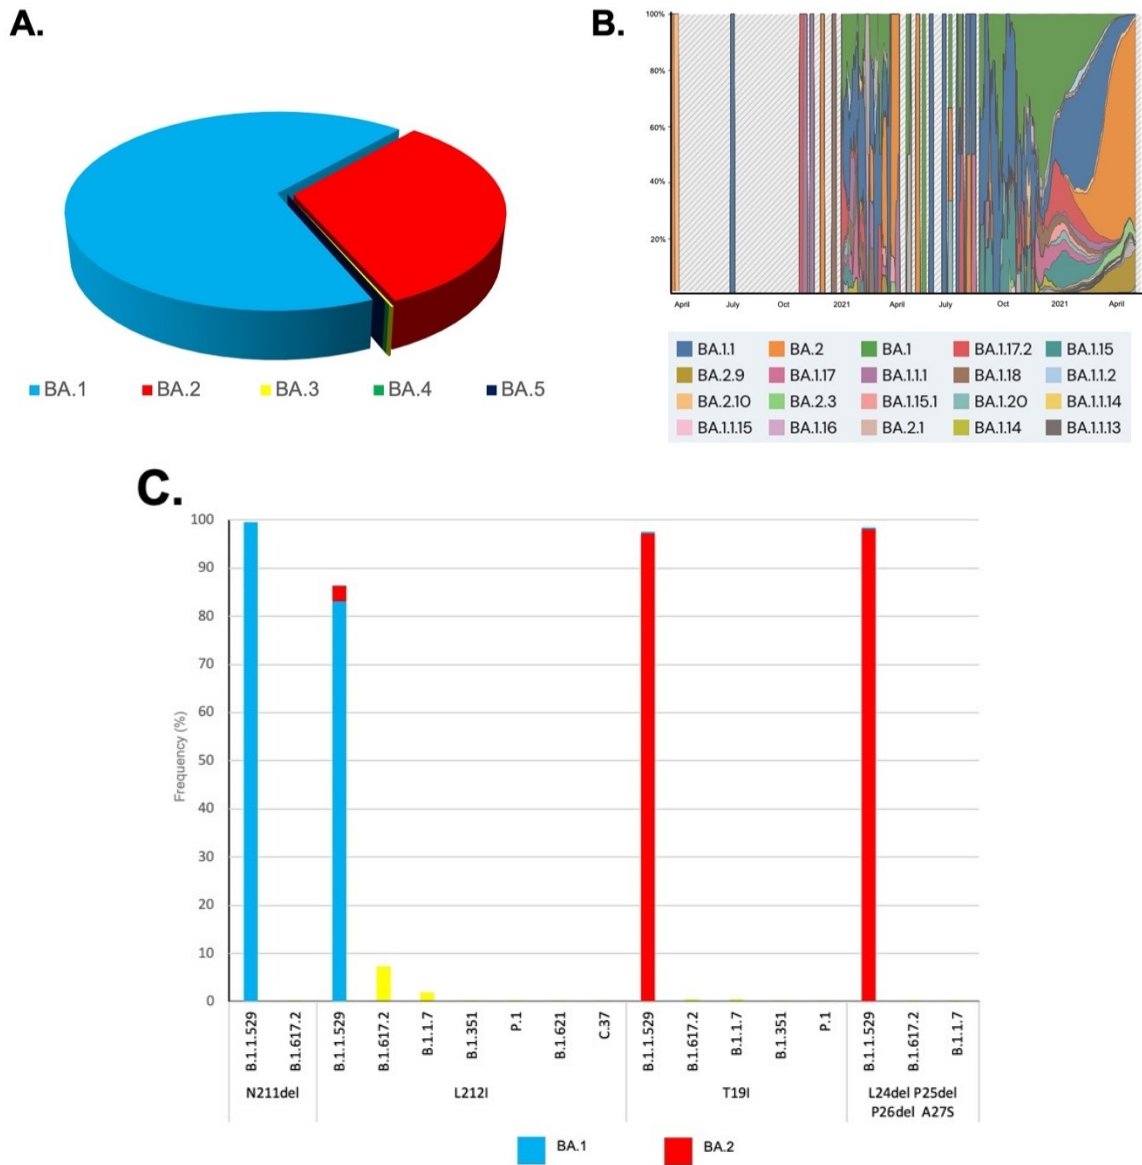

**Figure S1.** Overview of Omicron strains (B.1.1.529), based on genomes deposited on the GISAID platform until 05/01/2022. In **A**, the relationship between the amounts of genomes belonging to the BA.1, BA.2, BA.3, BA.4 and BA.5 lineages deposited on the GISAID platform. In **B**, the worldwide occurrence of Omicron strains according to time, made available by the outbreak.info website, based on data from the GISAID platform. In **C**, the incidence of mutations used for primer design in the target lineage.



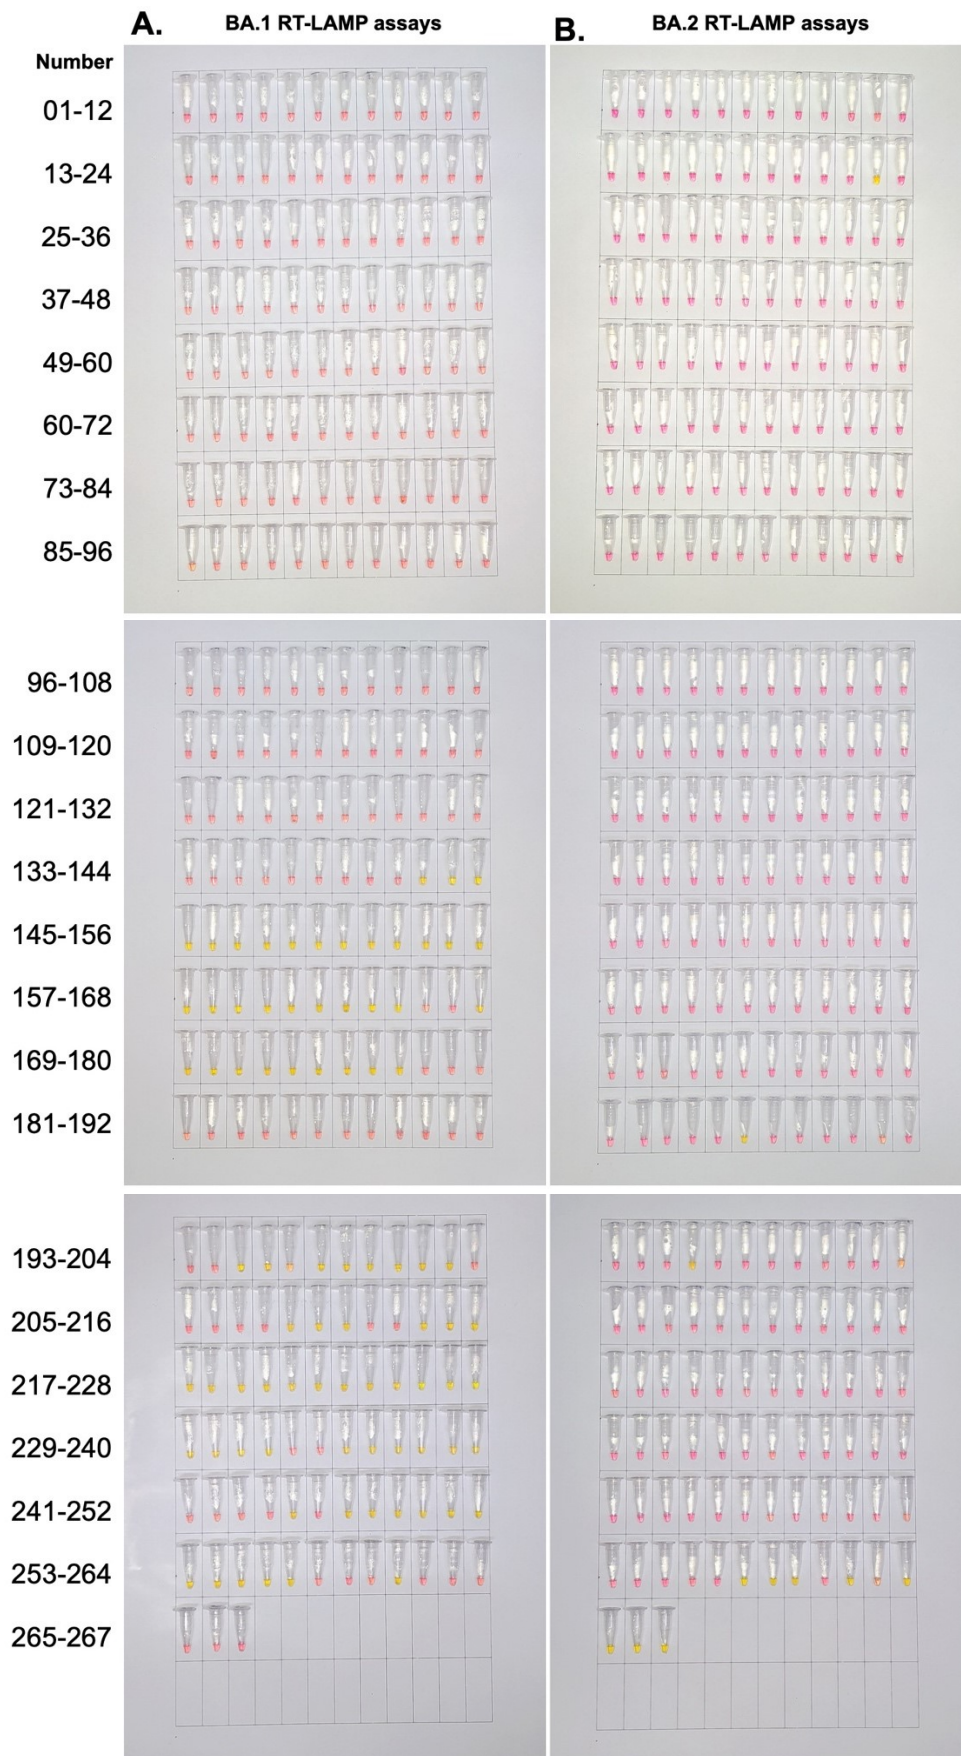

**Figure S2.** Photographic result of colorimetric RT-LAMP assays for BA.1 (A) and BA.2 (B) in the panel of 267 clinical RNA samples.
